# Supplementary material for: Retinoic acid inducible gene-I mediated detection of bacterial nucleic acids in human microglial cells
Source: PubMed Central journal article supplement (PMC7195775; doi:10.1186/s12974-020-01817-1), 2020-05-01
Supplement: 12974_2020_1817_MOESM1_ESM.pdf [file 12974_2020_1817_MOESM1_ESM.pdf]

1  
2  
3  
4 **SUPPLEMENTAL 1: Sequences used for RNA and DNA triangles:**

5  
6  
7 Triangles were assembled by combining equimolar solutions of the following strands:

8  
9 DNA Triangle:

10  
11 dT<sub>1</sub>

12  
13 5`-

14  
15  
16 GGATGCTGGTACTTTTGAAACATTTCGAGTCGCGAGGGTTTTCCCATCGTTGGCCCCG

17  
18  
19 TA

20  
21 TCGCGTTTTCTTATGAAGA

22  
23  
24 dT<sub>2</sub>

25  
26 5`-GGTCGCGACCTTCTTTTCCCTCGCGACTCGAAATGTTTCTTTTCGAGGTCGCCC

27  
28  
29 dT<sub>3</sub>

30  
31 5`-GGATCTTTCGCCTTTTCGCGATACGGGCCAACGATGGGTTTTGAAGGTCGCGAC

32  
33  
34 dT<sub>4</sub>

35  
36 5`-GGGCGACCTCGTTTTGTACCAGCATCCTCTTCATAAGTTTTGGCGAAAGATCC

37  
38  
39  
40  
41 RNA Triangle:

42  
43 rT<sub>1</sub>

44  
45  
46 5`-

47  
48 GGAUGCUGGUACUUUUGAAACAUUUCGAGUCGCGAGGGUUUUCUCAUCGUUGGC

49  
50  
51 CC

52  
53 GUAUCGCGUUUUCUUAUGAAGA

54  
55  
56 rT<sub>2</sub>
